# Supplementary material for: Assessment of four organophosphorus pesticides as inhibitors of human acetylcholinesterase and butyrylcholinesterase
Source: PubMed Central journal article supplement (PMC8563940; doi:10.1038/s41598-021-00953-9), 2021-11-02
Supplement: 41598_2021_953_MOESM1_ESM.pdf [file 41598_2021_953_MOESM1_ESM.pdf]

## **Supplementary material**

# **Assessment of four organophosphorus pesticides as inhibitors of human acetylcholinesterase and butyrylcholinesterase**

**Tena Čadež, Dora Kolić, Goran Šinko and Zrinka Kovarik\***

Institute for Medical Research and Occupational Health, Ksaverska cesta 2, HR-10 000 Zagreb,  
Croatia

\*Correspondence: Z Kovarik ([zkovarik@imi.hr](mailto:zkovarik@imi.hr); + 3851 4682 555)

**Table S1.** Reactivation of pesticide-inhibited human AChE with selected oximes (0.1 mM). Obidoxime, TMB-4 and 2-PAM were 0.05 mM in reactivation of methamidophos-hAChE conjugates. Inhibition (%) of AChE with 1 μM oxime is also given.

| Oxime     | Oxime structure | Inhibition % | Methamidophos                      |                                  |       | Fenamiphos                         |                                  |       |
|-----------|-----------------|--------------|------------------------------------|----------------------------------|-------|------------------------------------|----------------------------------|-------|
|           |                 |              | $k_{\text{obs}} / \text{min}^{-1}$ | $\text{React}_{\text{max}} / \%$ | t / h | $k_{\text{obs}} / \text{min}^{-1}$ | $\text{React}_{\text{max}} / \%$ | t / h |
| 1A        |                 | 13           | 1.3721                             | 62                               | 0.16  | 0.0061                             | 42                               | 5     |
| 2A        |                 | 10           | 0.0159                             | 74                               | 24    | 0.0020                             | 13                               | 24    |
| 3A        |                 | 30           | 0.0094                             | 76                               | 5     | 0.0023                             | 9                                | 10    |
| 4A        |                 | 24           | 0.1021                             | 66                               | 0.5   | 0.0031                             | 42                               | 12    |
| 5A        |                 | 9            | 0.3533                             | 72                               | 0.5   | 0.0016                             | 31                               | 6     |
| 9A        |                 | 63           | 0.0013                             | 25                               | 24    | 0.0000                             | 0                                | 24    |
| 14A       |                 | 10           | 6.7944                             | 68                               | 0.08  | 0.0062                             | 42                               | 3     |
| 20A       |                 | 23           | 0.0352                             | 59                               | 1     | 0.0020                             | 34                               | 6     |
| 1B        |                 | 6            | 0.0623                             | 100                              | 1     | 0.0003                             | 5                                | 24    |
| 2B        |                 | 3            | 0.0580                             | 58                               | 1     | 0.0008                             | 18                               | 10    |
| RS194B    |                 | 9            | 2.0772                             | 67                               | 0.5   | 0.0059                             | 17                               | 4     |
| Obidoxime |                 | 10           | 2.2807                             | 86                               | 0.16  | 0.0081                             | 48                               | 3.5   |
| TMB-4     |                 | 8            | 4.2338                             | 83                               | 0.16  | 0.0177                             | 49                               | 1     |
| HI-6      |                 | 13           | 0.8518                             | 63                               | 0.19  | 0.0020                             | 58                               | 20    |
| 2-PAM     |                 | 11           | 1.1558                             | 86                               | 0.36  | 0.0011                             | 46                               | 20    |

**Table S2.** Oxime reactivator interactions with AChE active site residues (Figure 7).

| <b>Oxime</b> | <b>Hydrogen bond</b> | <b>Electrostatic</b> | <b>Hydrophobic</b> |
|--------------|----------------------|----------------------|--------------------|
| 1A           | Ser293               | Tyr337               | Trp86              |
|              | Val294               | Tyr341               | Tyr449             |
|              | Tyr337               |                      |                    |
|              | Tyr341               |                      |                    |
|              | His447               |                      |                    |
| 14A          | Asp74                | Asp74                | Tyr124             |
|              | Tyr124               | Tyr286               | Trp286             |
|              | Ser125               | Phe338               | Val294             |
|              | Tyr337               | Tyr341               | Tyr337             |
|              | Tyr341               |                      | Tyr341             |
| RS194B       | Asp74                | Asp74                | Trp286             |
|              | Tyr124               |                      | Phe297             |
|              | Ser125               |                      |                    |
|              | Tyr337               |                      |                    |
|              | Tyr341               |                      |                    |
| Obidoxime    | Asp74                | Asp74                | –                  |
|              | Tyr124               | Tyr341               |                    |
|              | Phe295               |                      |                    |
|              | Arg296               |                      |                    |
|              | Tyr337               |                      |                    |
| TMB-4        | Asp74                | Asp74                | Trp86              |
|              | Tyr124               |                      | Tyr124             |
|              | Ser293               |                      | Trp286             |
|              | Tyr337               |                      | Tyr341             |
|              | Tyr341               |                      |                    |

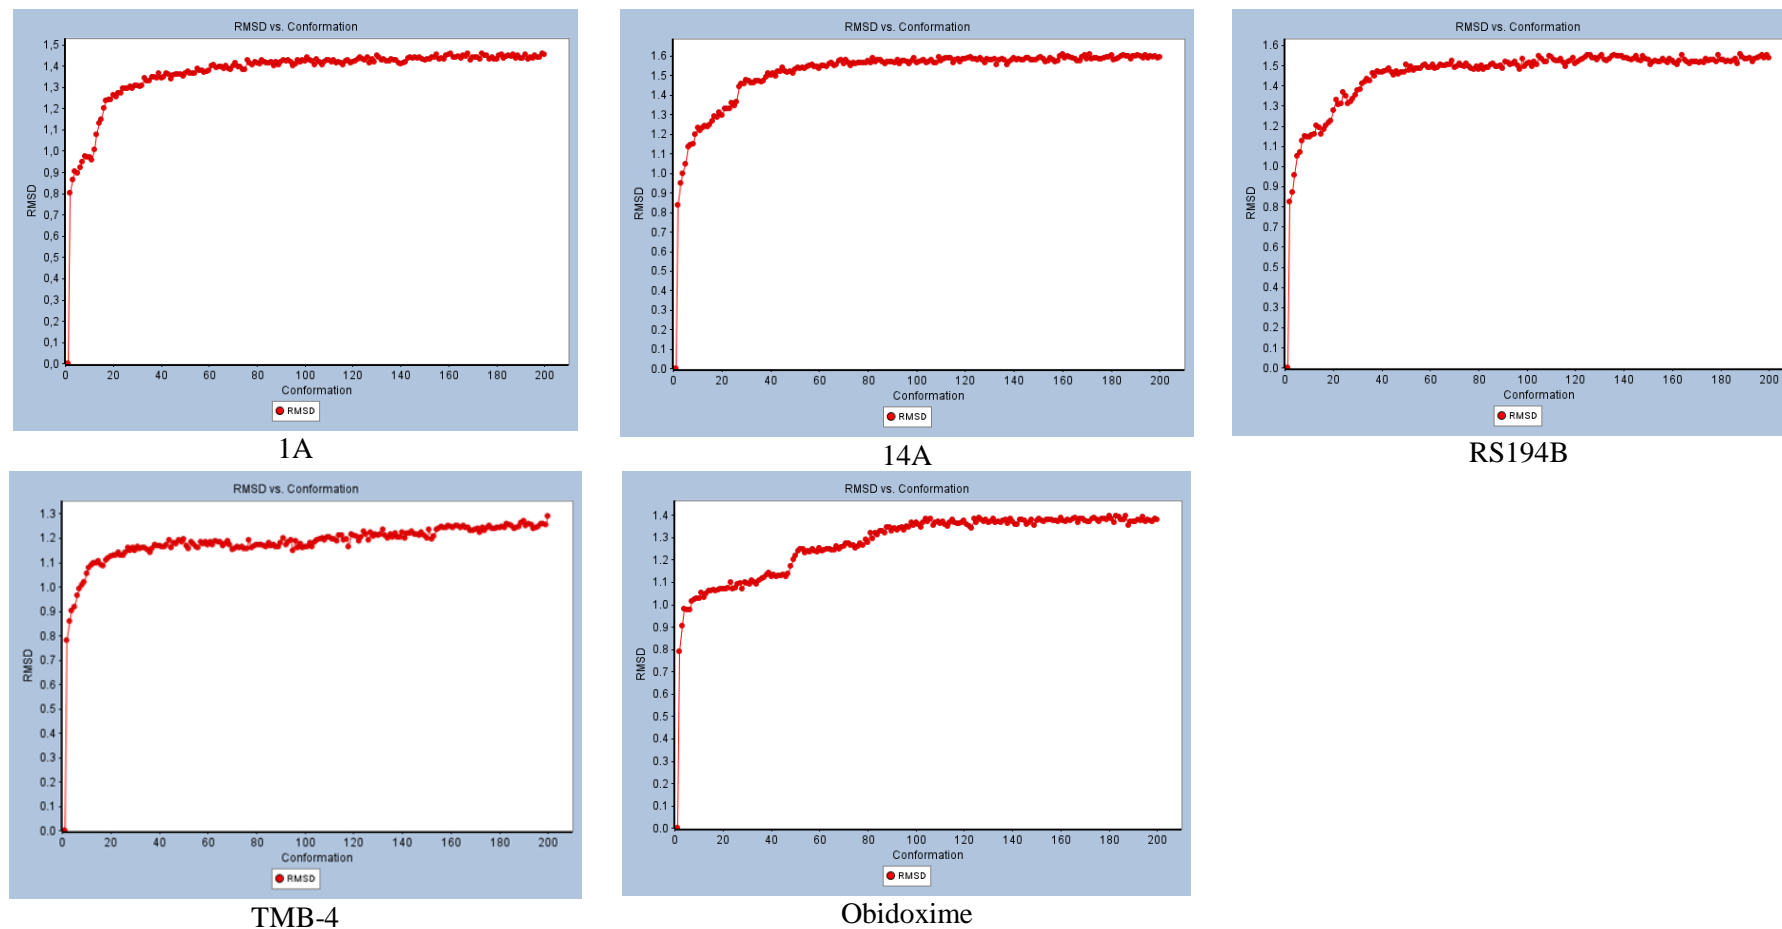

**Figure S1.** Change in RMSD value of modelled system during molecular dynamics of oxime in the AChE – methamidophos conjugate,  $t = 20$  ns.

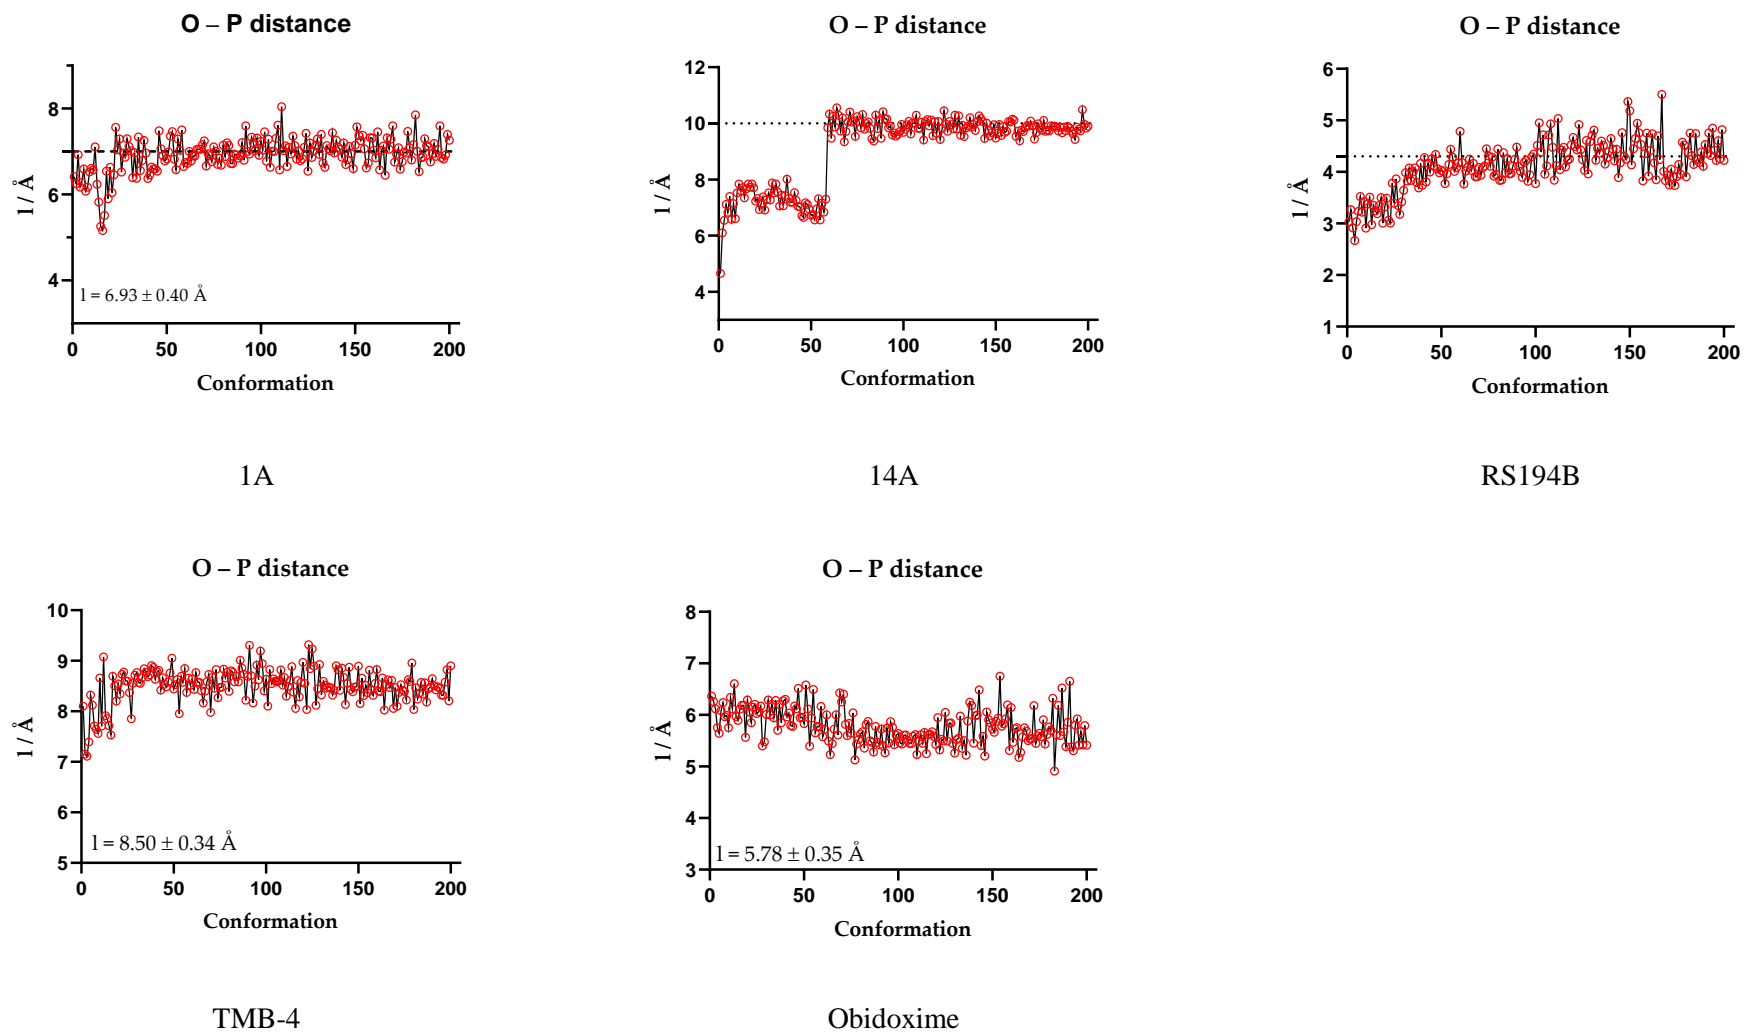

**Figure S2.** Change in distance ( $l$ ) between deprotonated O atom of the oxime group and P atom in the AChE – Methamidophos conjugate. When standard deviation of  $l$  was less than 10% of mean, average value is reported. Duration of molecular dynamics of system was  $t = 20 \text{ ns}$ .
